# Supplementary material for: Structure and Function of the Su(H)-Hairless Repressor Complex, the Major Antagonist of Notch Signaling in Drosophila melanogaster
Source: PLOS journal article supplement (doi:10.1371/journal.pbio.1002509), 2016-07-12
Supplement: S6 (10.1371/journal.pbio.1002509.s006) [file journal.pbio.1002509.s006]

gmr-Gal4

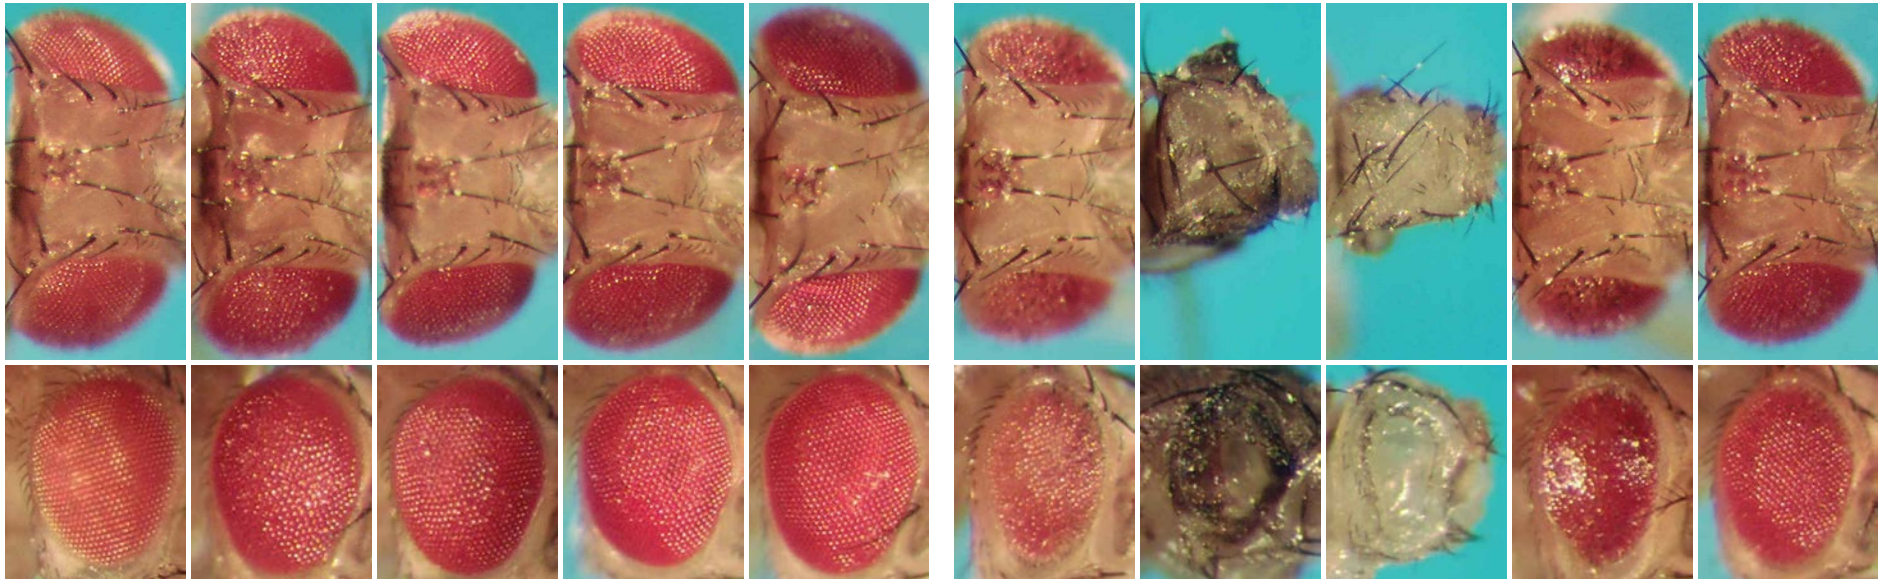

control

Su(H)<sup>wt</sup>

Su(H)<sup>LL/AA</sup>

Su(H)<sup>LLF/AAA</sup>

Su(H)<sup>LLL/AAA</sup>

Hairless

Su(H)<sup>wt</sup>

Su(H)<sup>LL/AA</sup>

Su(H)<sup>LLF/AAA</sup>

Su(H)<sup>LLL/AAA</sup>

plus Hairless
